# Supplementary material for: Confined Irradiation Vacuum Ultraviolet Abatement Technique for Perfluorinated Compounds
Source: Research Square preprint supplement (doi:10.21203/rs.3.rs-6998262/v1), 2025-07-08
Supplement: Supplementary file 1 [file d3b2a10b48df0083b6e93d9b.docx]

**Confined Irradiation Vacuum Ultraviolet Abatement Technique for Perfluorinated Compounds**

Yanei Xuea, Wenjun Suna,#, Wentao Lib, Guoqing Jianga, Ranlong Xua, Yuanna Zhanga

a School of Environment

Tsinghua University

Beijing, 100084, China

E-mail: wsun@tsinghua.edu.cn

b School of Science and Engineering

Shanghai Jiao Tong University

Shanghai, 200030, China

contents

[Table 1. Available performance and conditions for reactions of *PFASs* in related VUV185 reactors. 2](#_Toc202038102)

[Table 2. The structure of *PFASs* and *BDE* (bond dissociation energy) of C–C bonds in *PFAS* molecule. 3](#_Toc202038103)

[Table 3. The *k*ors and *DeF*% of *PFASs* by VUV_CI/CB with various confined height. 5](#_Toc202038104)

[Table 4. The chain reaction between the various free radicals. 6](#_Toc202038105)

[Figure S1. Time distributions of decay rate of 10 *PFASs* under VUV_DI, VUV_CI and VUV_CI/CB. 7](#_Toc202038106)

[Fig. 2. the EPR spectra of FRs in the VUV_CI. 8](#_Toc202038107)

[Fig. 5 Identified representative transfer products(TPs) of *PFASs* under VUV_CI/CB irradiation. 9](#_Toc202038108)

[Text 1. Detailed Information on Materials and Methods 19](#_Toc202038109)

[Text 2. Measurement of *PFAS* Parent Compound. 19](#_Toc202038110)

[Text 3. Identification of TPs via non-target screening analysis. 19](#_Toc202038111)

[Table 5. UPLC‒QTOF/MS analysis conditions for the identification of TPs. 20](#_Toc202038112)

[References 21](#_Toc202038113)

**Supplementary Information**

**Table 1. Available performance and conditions for reactions of** *PFASs* **in related VUV185 reactors.**

| *PFAS* | *deC%*  (*kros,* min-1) | *DeF%*  (*VOF*) | TOC% | Reaction conditions | Ref |
| --- | --- | --- | --- | --- | --- |
| *PFOA* | 62%  (0.0018) | 27% | -- | pH 12, 480min, light sources(LS): 8.0 mW/cm2, closed quartz tubes, 40mL | [1] |
| *PFOA* | 99%  (0.012) | 20% | -- | pH (original), 180min, SEN Light Corporation:20.73 mW/cm2, glass reactor, 1.5L | [2] |
| *PFOA* | 88%  (0.0045) | 15% | -- | pH 10, 360min, Sankyo Electric Corporation, closed Pyrex glass reactor, 2L | [3] |
| *PFOA* | 80%  (0.025) | 25% | -- | pH (original), 120min, Cnlight Corporation: 62–69 mW/cm2, tubular glass reactor,0.8L | [4] |
| *PFOA* | -- | 43.2% | -- | pH 5, 360min, Shanghai Jiguang Special Lighting Appliance Factory, China, cylindrical glass reactor, 250mL | [5] |
| *PFOA* | 61.7%  (0.0558) | 17.1% | -- | pH 3.7, 120min, LS, tubular glass reactor, 800mL | [6] |
| *C7 HFPO-TA* | 58%  (0.0021) | 27% | 30% | pH 12, 480min, LS: 8.0 mW/cm2, closed quartz tubes, 40mL | [[1]](#_ENREF_1) |
| *HFPO-DA* | 40%  (0.016) | 56%  (40%) | -- | pH 6, 180min, Sankyo Electric Corporation:0.65mW/cm2, batch-type photoreactor, 1.2L | [7] |
| *PFAS* | 2%–100%  (0-0.299) | 3–54%  (0–26%) | 6–63% | pH(original), 180min, LS:0.095mW/cm2, stainless steel chamber photoreactor, dynamic irradiation, 0.237L | this article |
| *PFAS* | 100%  (0.039–0.715) | 46−81%  (4–15%) | 56−88% | pH(original), 80min, LS:0.095mW/cm2, stainless steel chamber photoreactor, CI, 0.237L | this article |
| *PFAS* | 100%  (0.0738–0.914) | 100%  (3.5–15%) | 87−100% | pH(original), 55min, LS: 0.13mW/cm2, VUV_CB,80 mL | this article |

**Table 2. The structure of** *PFASs* **and** *BDE* **(bond dissociation energy) of C–C bonds in** *PFAS* **molecule.**

1. *PFOA*


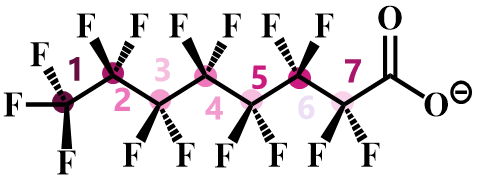


| Bond | *BDE*(kcal/mol) | Bond(left to right) | *BDE*(kcal/mol) |
| --- | --- | --- | --- |
| C–C 1 | 90.95004438 | C−F | 120.7730846 |
| C–C 2 | 86.87938701 | C−F | 113.1601333 |
| C–C 3 | 86.01342321 | C−F | 111.06927 |
| C–C 4 | 86.1759483 | C−F | 111.3503945 |
| C–C 5 | 86.85303159 | C−F | 110.6933915 |
| C–C 6 | 81.54115944 | C−F | 111.9195461 |
| C–C 7 | 87.8200245 | C−F | 106.6767 |

1. *GenX*


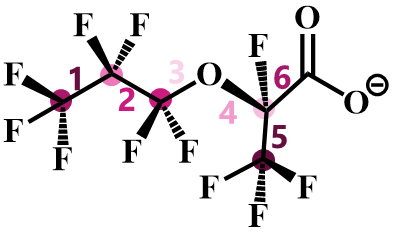


| Bond | *BDE*(kcal/mol) | Bond(left to right) | *BDE*(kcal/mol) |
| --- | --- | --- | --- |
| C–C 1 | 90.29804382 | C−F | 121.3761218 |
| C–C 2 | 84.889112 | C−F | 111.5706505 |
| C–C 3 | 77.32740227 | C−F | 115.025093 |
| C–C 4 | 78.53810945 | C−F | 102.9430155 |
| C–C 5 | 88.90237690 | C−F | 123.2699469 |
| C–C 6 | 85.035892 |  |  |

1. *6:2 FTS*


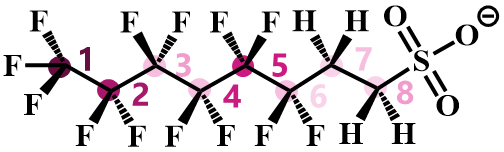


| Bond | *BDE*(kcal/mol) | Bond(left to right) | *BDE*(kcal/mol) |
| --- | --- | --- | --- |
| C–C 1 | 90.50427831 | C−F | 120.43608612 |
| C–C 2 | 87.38421904 | C−F | 115.20951743 |
| C–C 3 | 83.01447206 | C−F | 107.59247012 |
| C–C 4 | 86.19985103 | C−F | 106.32857229 |
| C–C 5 | 86.893632 | C−F | 112.754209 |
| C–C 6 | 68.43205318 | C−F | 104.32188723 |
| C–C 7 | 71.724016 | C−H | 55.690352186 |
| C–S 8 | 70.24509445 | C−H | 57.903461 |

1. *PFOS*


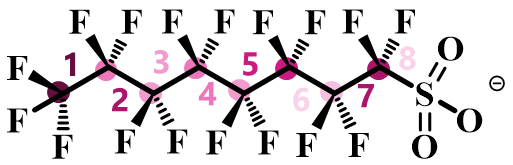


| Bond | *BDE*(kcal/mol) | Bond(left to right) | *BDE*(kcal/mol) |
| --- | --- | --- | --- |
| C–C 1 | 89.13465795 | C−F | 120.763672 |
| C–C 2 | 85.08470841 | C−F | 110.6419357 |
| C–C 3 | 84.26016027 | C−F | 109.3455 |
| C–C 4 | 84.56073756 | C−F | 110.6400532 |
| C–C 5 | 84.94665621 | C−F | 109.4383715 |
| C–C 6 | 84.64419639 | C−F | 111.1690441 |
| C–C 7 | 87.67130463 | C−F | 109.2865141 |
| C–S 8 | 64.73455911 | C−F | 112.2063181 |

**Table 3. The *k*ors and *DeF*% of** *PFASs* **by VUV_CI/CB with various confined height.**

| Confined height(mm) | *6:2FTS*  (*kors/DeF*%) | *GenX* (*kors/DeF*%) | *PFOA*  (*kors/DeF*%) | *PFOS*  (*kors/DeF*%) |
| --- | --- | --- | --- | --- |
| 4 | 0.384/67% | 0.113/71% | 0.085/69% | 0.012/38% |
| 5 | 0.531/73% | 0.192/78% | 0.108/81% | 0.033/55% |
| 6 | 0.609/82% | 0.236/89% | 0.122/90% | 0.0414/63% |
| 7 | 0.712/91% | 0.284/91% | 0.135/93% | 0.062/80% |
| 8 | 0.754/100% | 0.305/98% | 0.144/100% | 0.084/95% |
| 9 | 0.799/100% | 0.314/100% | 0.148/100% | 0.086/100% |
| 10 | 0.799/100% | 0.314/100% | 0.148/100% | 0.086/100% |
| 11 | 0.799/100% | 0.314/100% | 0.148/100% | 0.086/100% |
| 12 | 0.799/100% | 0.314/100% | 0.148/100% | 0.086/100% |
| 13 | 0.799/100% | 0.314/100% | 0.148/100% | 0.086/100% |
| 14 | 0.645/87% | 0.309/98% | 0.131/91% | 0.084/95% |
| 15 | 0.513/78% | 0.275/90% | 0.117/82% | 0.075/86% |
| 16 | 0.431/73% | 0.218/87% | 0.109/80% | 0.068/67% |
| 17 | 0.330/69% | 0.194/84% | 0.096/71% | 0.051/45% |
| 18 | 0.271/65% | 0.187/80% | 0.091/64% | 0.044/32% |
| 19 | 0.218/59% | 0.173/78% | 0.088/62% | 0.044/32% |
| 20 | 0.187/56% | 0.166/73% | 0.087/62% | 0.044/32% |
| 25 | 0.174/56% | 0.166/73% | 0.087/62% | 0.044/32% |
| 30 | 0.173/55% | 0.166/73% | 0.086/62% | 0.044/32% |
| 35 | 0.171/55% | 0.165/73% | 0.086/62% | 0.044/32% |
| 40 | 0.170/54% | 0.165/93% | 0.086/62% | 0.044/32% |

**Table 4. The chain reaction between the various free radicals.**

|  | Reaction | Constant |
| --- | --- | --- |
| *R1* |  |  |
| *R2* |  |  |
| *R3* |  |  |
| *R4* |  |  |
| *R5* |  |  |
| *R6* |  |  |
| *R7* |  |  |
| *R8* |  |  |
| *R9* |  |  |
| *R10* |  |  |
| *R11* |  |  |
| *R12* |  |  |
| *R13* |  |  |
| *R14* |  |  |
| *R15* |  |  |
| *R16* |  |  |
| *R17* |  |  |
| *R18* |  |  |
| *R19* |  |  |
| *R20* |  |  |
| *R21* |  |  |
| *R22* |  |  |
| *R23* |  |  |
| *R24* |  |  |
| *R25* |  |  |
| *R26* |  |  |
| *R27* |  |  |
| *R28* |  |  |
| *R29* |  |  |
| *R30* |  |  |
| *R31* |  |  |
| *R32* |  |  |

## Figure S1. Time distributions of decay rate of 10 *PFASs* under VUV_DI, VUV_CI and VUV_CI/CB.

When C*PFAS*=10 mg L-1, the pH values of the samples were all at their initial values, and no buffering was performed.


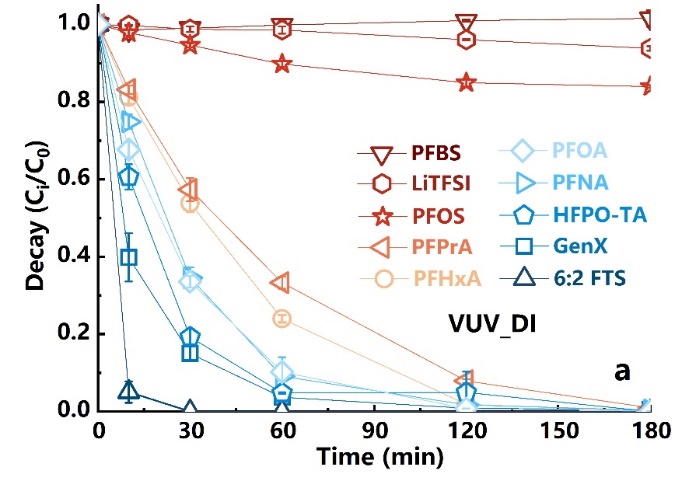

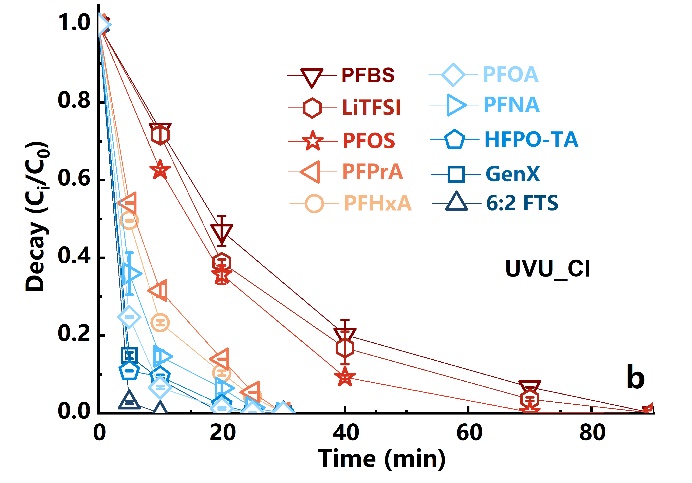


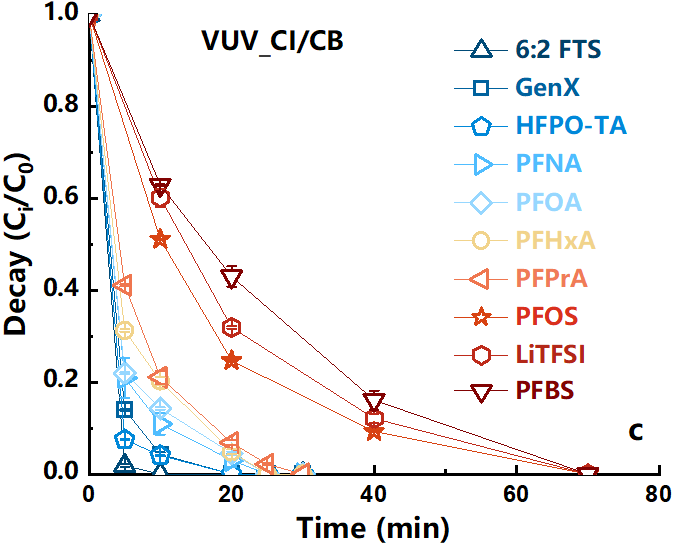


## Fig. 2. the EPR spectra of FRs in the VUV_CI.

EPR spectra of TEMPO trapped by a *RFR* with a reaction time(a) and (b), the *OFR*(·OH) response spectra of trapped by DMPO(c).


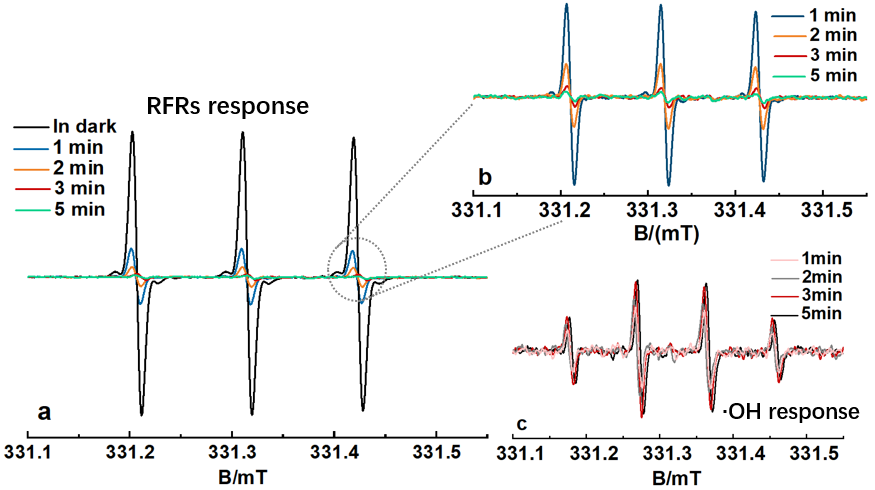


**Fig. 5 Identified representative transfer products(TPs) of** *PFASs* **under VUV**_CI/CB **irradiation.**


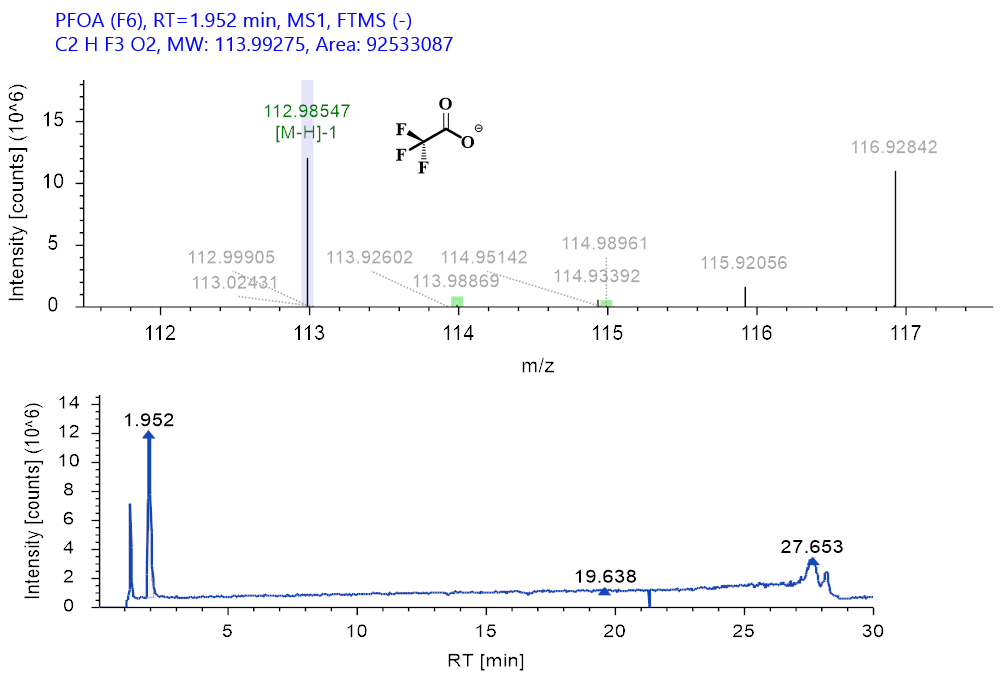


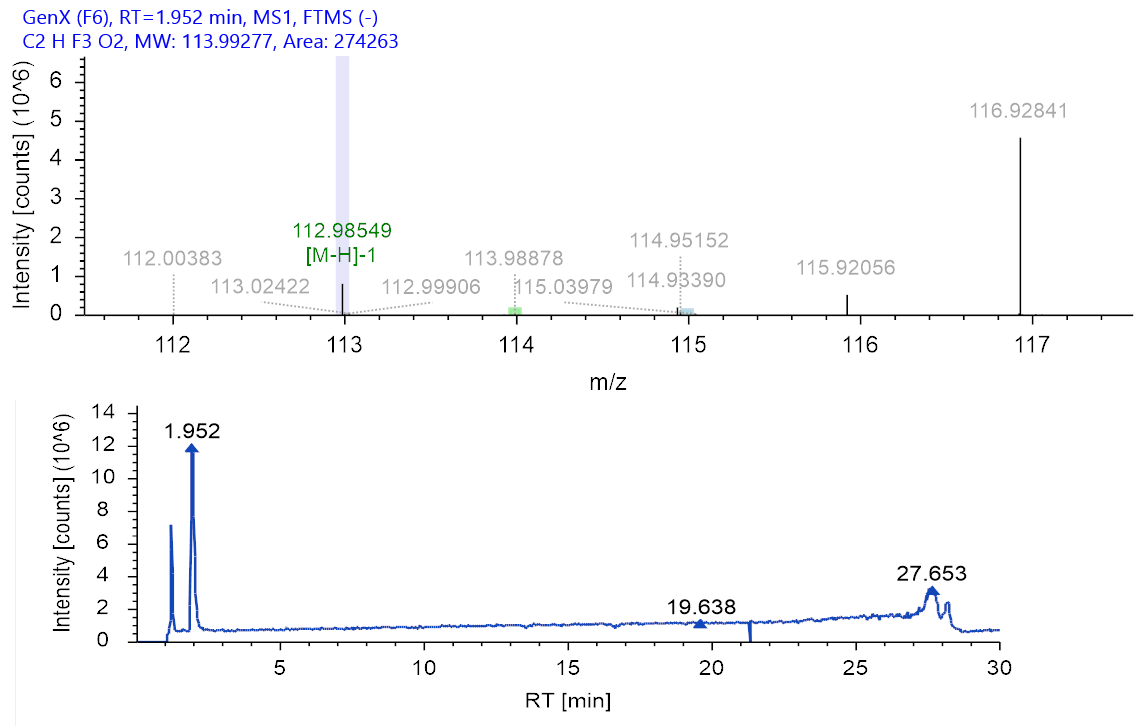


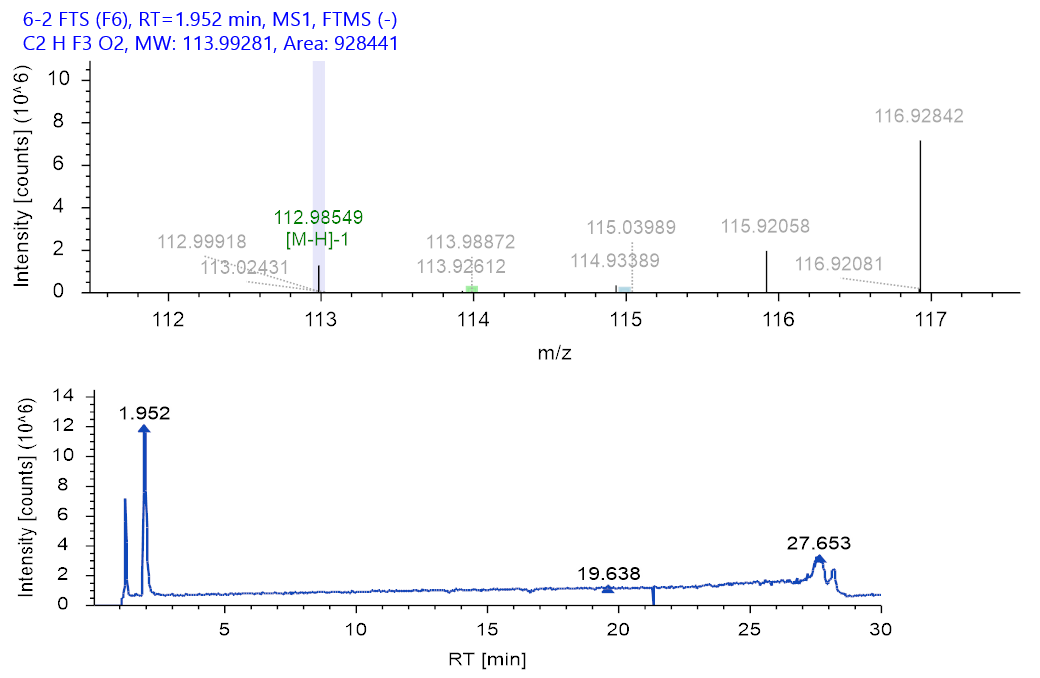


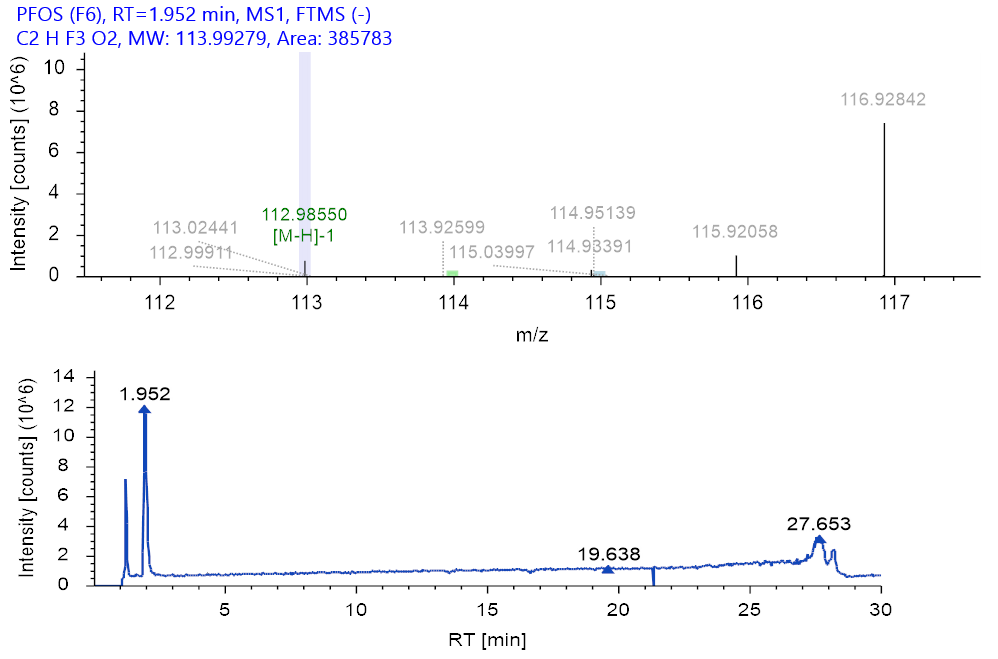


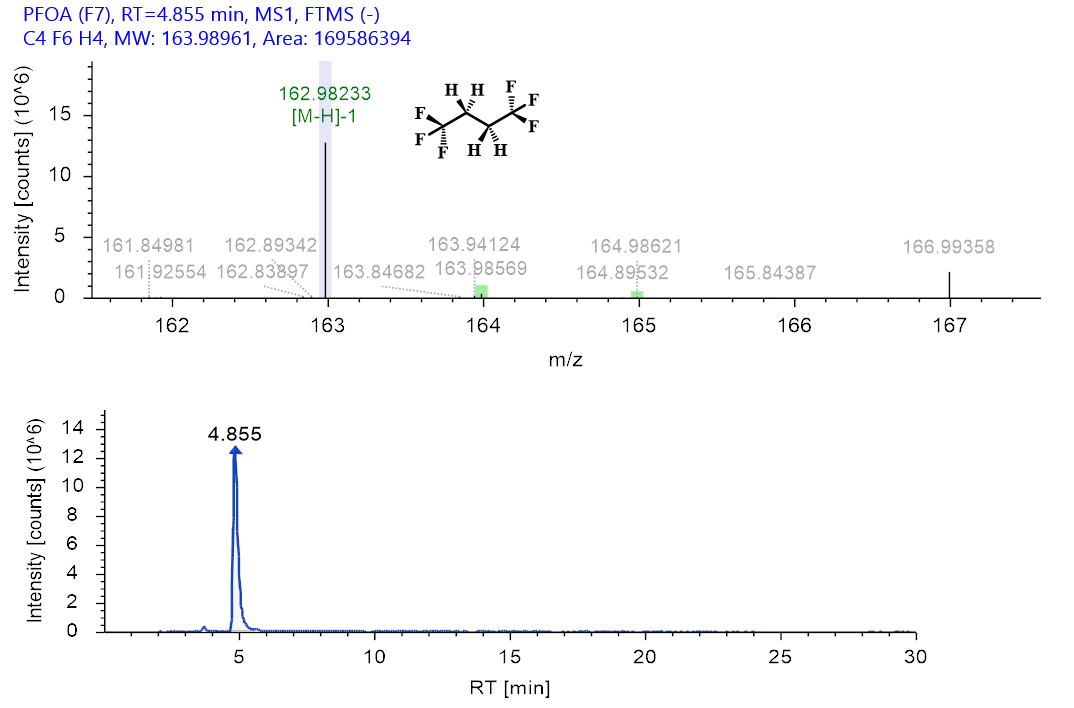


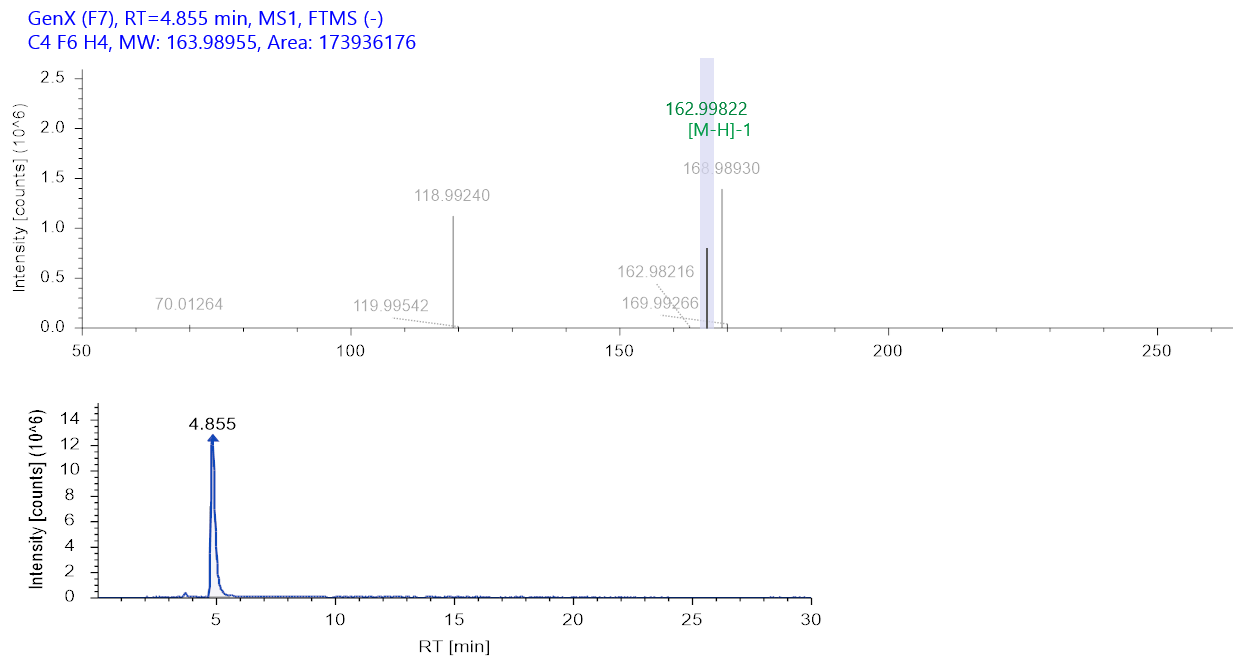


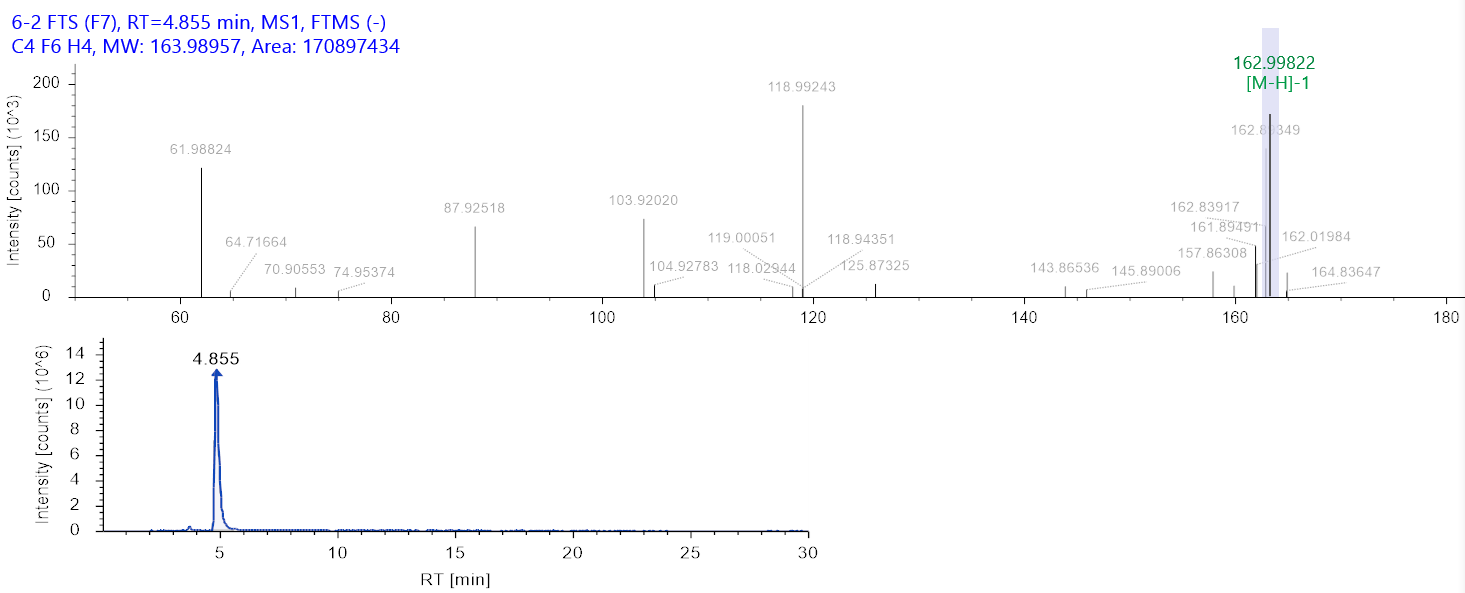


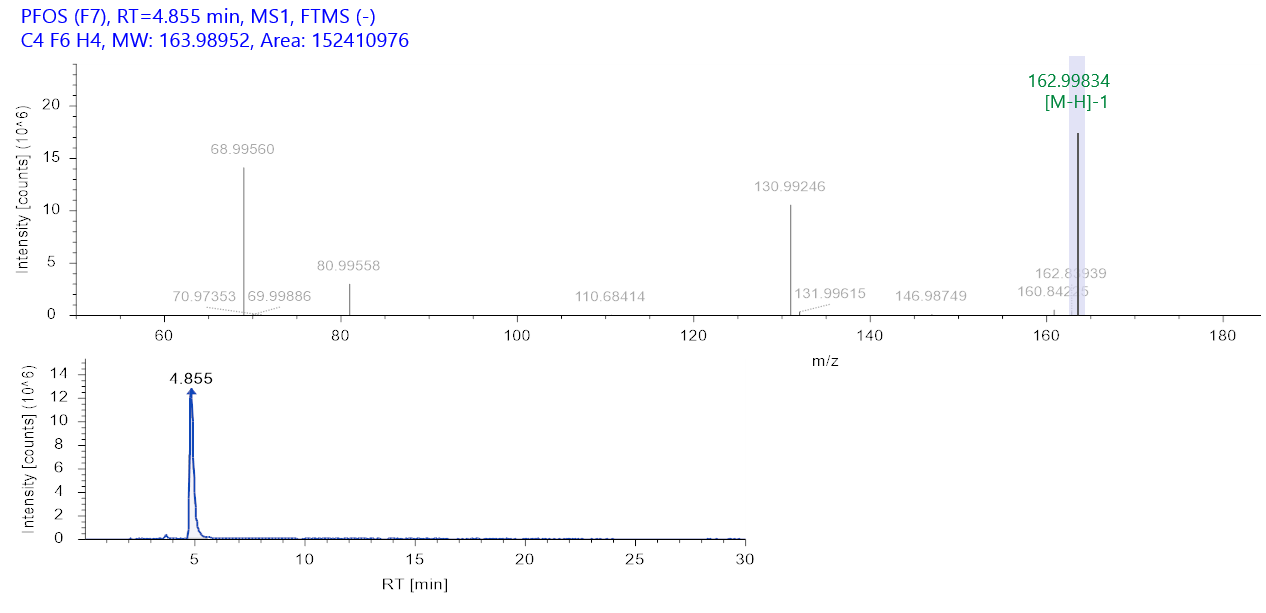


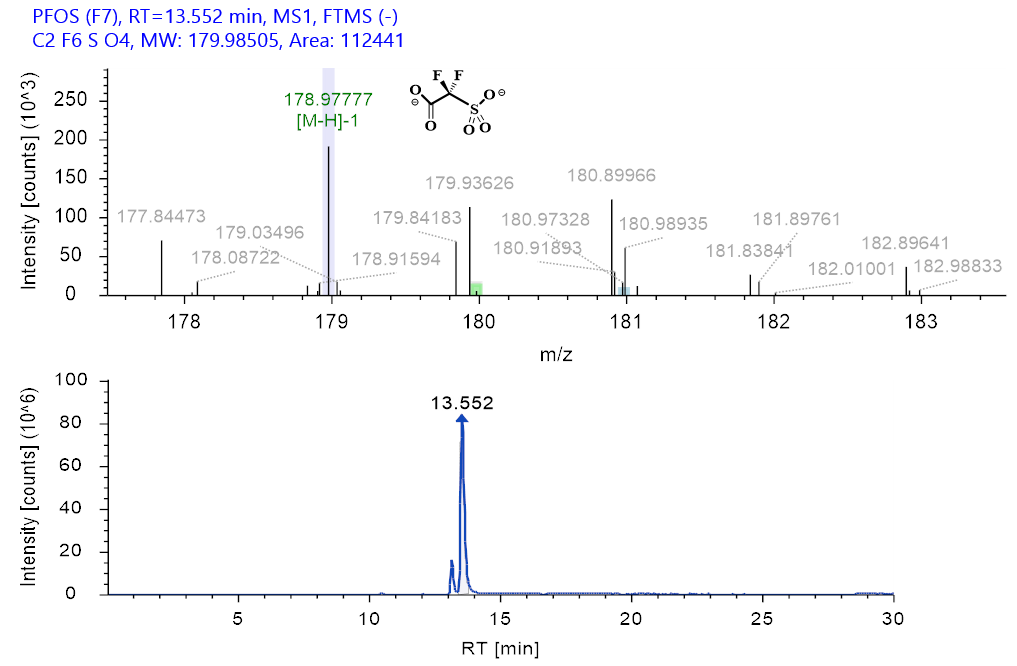


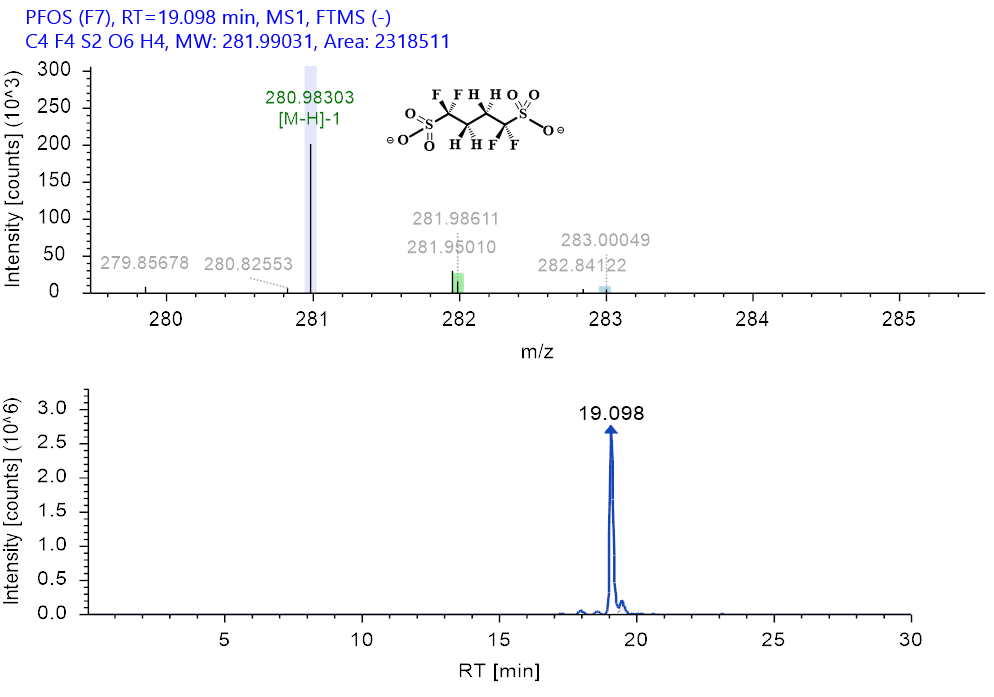


## Text 1. Detailed Information on Materials and Methods

The four *PFCAs* (*PFPrA, PFHxA, PFOA, PFNA,* ≥96%) and two *PFECA* (*GenX* and *HFPO-TA*, ≥96%) and *6:2 FTS* (≥96%) were purchased from Macklin Reagent and ANPEL-TRACE Stard Technical Services Co., Ltd. (Shanghai, China). Three *PFISA* (*LiTFSI*, *PFBS* and *PFOS*) (≥96%), 4-Chlorobenzoic acid (*pCBA*, ≥99.0%) were obtained from Macklin Reagent Co., Ltd. Individual *PFAS* were dissolved in deionized water (produced by a Milli-Q system) as 10 mM stock solutions. All stock solutions were stored on benchtop at room temperature (20°C).

**Text 2. Measurement of** *PFAS* **Parent Compound.**

The concentrations of individual *PFAS* during the reaction were measured using a high performance liquid chromatography coupled with a tripe-stage quadrupole mass spectrometer (HPLC-MS/MS, API3200; Applied Biosystems). The HPLC separation was performed with a HPLC BEH C18 column (2.1 mm × 50 mm, 1.7 μm) at 40 °C, A in-line filter column(2μm) and a Eclipse XDB-C18 protective column(4.6×12.5mm, 5μm ) should be placed before the column to filter out the micro-particle catalysts that may be present in the sample; In the detection process, the mobile phase needs to cross the mobile phase degassing device of high performance liquid chromatography, and the mobile phase was degassed by non-on-line degassing device; Mobile phase was a gradient composition of solvent A(ammonium acetate methanol solution, 10mM) and solvent B (ammonium acetate aqueous solution, 10 mM). The gradient expressed as the concentration of solvent A was as follows: 0−7.5 min, a linear increase from 60% to 100%; 7.5−11 min, held at 100% A; 11−16.5 min, a linear decrease from 100% to 75%; 16.5−17 min, hold at 60% A. The flow rate was 0.3 mL min−1. An electrospray negative ionization mode was used to identify the products in the liquid phase. The pressure of sheath gas (N2) was 0.4 MPa. The capillary potential was −4.5 kV. The source temperature was 120 °C, and the desolvation temperature was 450 °C. The analysis was carried out in multiple reaction monitoring (MRM) mode.

**Text 3. Identification of TPs via non-target screening analysis.**

The non-targeted qualitative analysis data analyzed by LC-QTOF/MS went through the suspect screening process using UNIFI software (Waters, USA). Among the substances identified through the screening process, those that met all the following criteria were defined as TPs: (ⅰ) mass error < 10 ppm; (ⅱ) isotope match intensity RMS percent < 20%; and (ⅲ) peak area showing a continuous pattern over time, such as steady increase or a decrease after increase. After all, the confidence levels for the identified TPs were designated according to whether MSE fragmentation data was provided on UNIFI program.

**Table 5. UPLC‒QTOF/MS analysis conditions for the identification of TPs.**

| Instrument |  | Parameter | Value |
| --- | --- | --- | --- |
| UPLC‒QTOF/MS | UPLC | Column | Waters, ACQUITY UPLC BEH C18 (2.1 × 100 mm, 1.7 µm) |
|  |  | Column temperature | 40 °C |
|  |  | Sample temperature | 10 °C |
|  |  | Injection volume | 10 µL |
|  |  | Flow rate | 0.3 mL/min |
|  |  | Mobile phase | (A) Deionized water with 2 mM ammonium acetate  (B) Methanol with 2 mM ammonium acetate   | Time (min) | Flow (mL/min) | %A | %B | Curve | | --- | --- | --- | --- | --- | | 0.0 | 0.3 | 100 | 0 | - | | 0.5 | 0.3 | 80 | 20 | 6 | | 3.0 | 0.3 | 55 | 45 | 6 | | 6.0 | 0.3 | 20 | 80 | 6 | | 7.0 | 0.3 | 5 | 95 | 6 | | 8.0 | 0.3 | 5 | 95 | 6 | | 9.0 | 0.3 | 100 | 0 | 1 | | 10.0 | 0.3 | 100 | 0 | 1 | |
|  | QTOF/MS | Ionization mode | ESI negative |
|  |  | Acquisition range | 50–1200 Da |
|  |  | Collision voltage | Low: 4 V / High: 20–70 V |
|  |  | Cone voltage | 40 V |
|  |  | Capillary voltage | 1.5 kV |
|  |  | Source temperature | 100 °C |
|  |  | Desolvation temperature | 250 °C |
|  |  | Cone gas flow | 0 L/h |
|  |  | Desolvation gas flow | 800 L/h |
|  |  | Nebuliser gas flow | 6.5 bar |

**References**

(1) Gu, M.; Liu, L.; Yu, G.; Huang, J. Deeper Defluorination and Mineralization of a Novel PFECA (C7 HFPO-TA) in Vacuum UV/Sulfite: Unique Mechanism of H/OCF 3 Exchange. *Environ. Sci. Technol.* **2023**, *57* (40), 15288–15297.

(2) Giri, R. R.; Ozaki, H.; Guo, X.; Takanami, R.; Taniguchi, S. Oxidative–Reductive Photodecomposition of Perfluorooctanoic Acid in Water. *Int. J. Environ. Sci. Technol.* **2014**, *11* (5), 1277–1284.

(3) Park, H.; Kim, T.; Kim, J.; Kim, M.-K.; Eom, S.; Choi, Y.; Zoh, K.-D. Reductive Degradation Mechanism of Perfluorooctanoic Acid (PFOA) during Vacuum Ultraviolet (VUV) Reactions Combining with Sulfite and Iodide. *Chemosphere* **2024**, *348*, 140759.

(4) Cao, M. H.; Wang, B. B.; Yu, H. S.; Wang, L. L.; Yuan, S. H.; Chen, J. Photochemical Decomposition of Perfluorooctanoic Acid in Aqueous Periodate with VUV and UV Light Irradiation. *J. Hazard Mater.* **2010**, *179* (1–3), 1143–1146.

(5) Li, Y.; Lin, Q.; Li, C.; Weiguo, Z.; Xu, L.; Zhang, K. The Defluorination of Perfluorooctanoic Acid by Different Vacuum Ultraviolet Systems in the Solution. Water Environ. Res. **2021**, *93* (3), 455–463.

(6) Chen, J.; Zhang, P.; Liu, J. Photodegradation of Perfluorooctanoic Acid by 185 Nm Vacuum Ultraviolet Light. *J Environ. Sci.* **2007**, *19* (4), 387–390.

(7) Kim, J.; Kim, T.; Park, H.; Kim, M.-K.; Eom, S.; Choe, Y.; Choe, J. K.; Zoh, K.-D. Kinetics and Proposed Mechanisms of Hexafluoropropylene Oxide Dimer Acid (GenX) Degradation via Vacuum-UV (VUV) Photolysis and VUV/Sulfite Processes. *J. Hazard Mater.* **2024**, *463*, 132864.
